# Supplementary material for: Chemical bath deposition of NiCo2S4 nanostructures supported on a conductive substrate for efficient quantum-dot-sensitized solar cells and methanol oxidation
Source: Royal Society of Chemistry journal article supplement (doi:10.1039/c8nj02379d), 2018-01-01
Supplement: c8nj02379d1.pdf [file c8nj02379d1.pdf]

## Electronic Supplementary Information

### Chemical bath deposition of $\text{NiCo}_2\text{S}_4$ nanostructures supported on conductive substrate for efficient quantum-dot-Sensitized solar cells and methanol oxidation

Hee-Je Kim, Chebrolu Venkata Thulasi-Varma,\*

School of Electrical Engineering, Pusan National University, Gumjeong-Ku, Jangjeong-Dong, Busan 609-735, Republic of Korea.

\*Corresponding author. Tel: +821097909029; fax: +82515130212.

E-mail address: chebrolu.thulasi@gmail.com

### Energy-Dispersive X-ray (EDX) Spectroscopy of $\text{NiCo}_2\text{S}_4$ nanostructures:

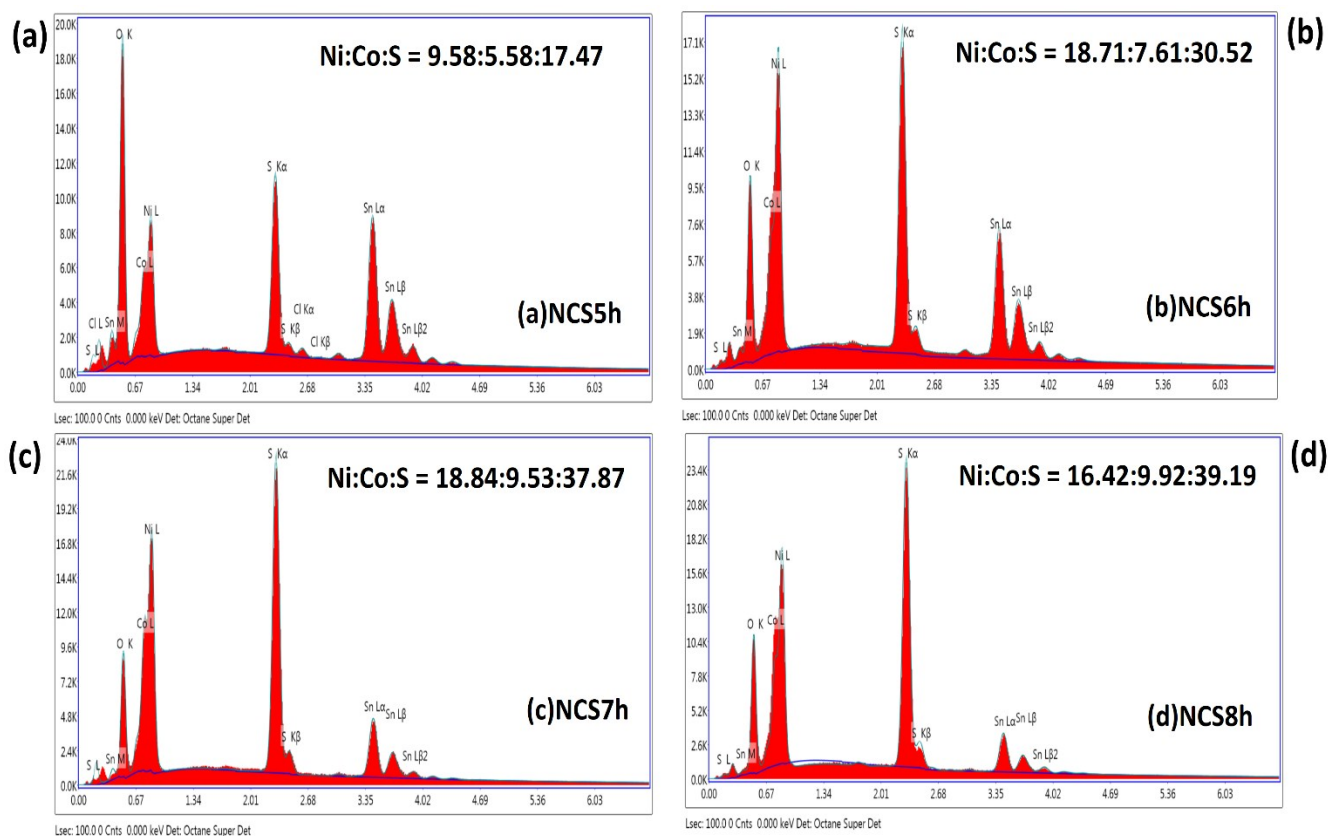

**Fig. S1.** (a-d) Energy-Dispersive X-ray (EDX) Spectroscopy of  $\text{NiCo}_2\text{S}_4$  nanostructures: (a) NCS5h, (b) NCS6h, (c) NCS7h, and (d) NCS8h.

AFM image of NCS7h and NCS8h electrodes:

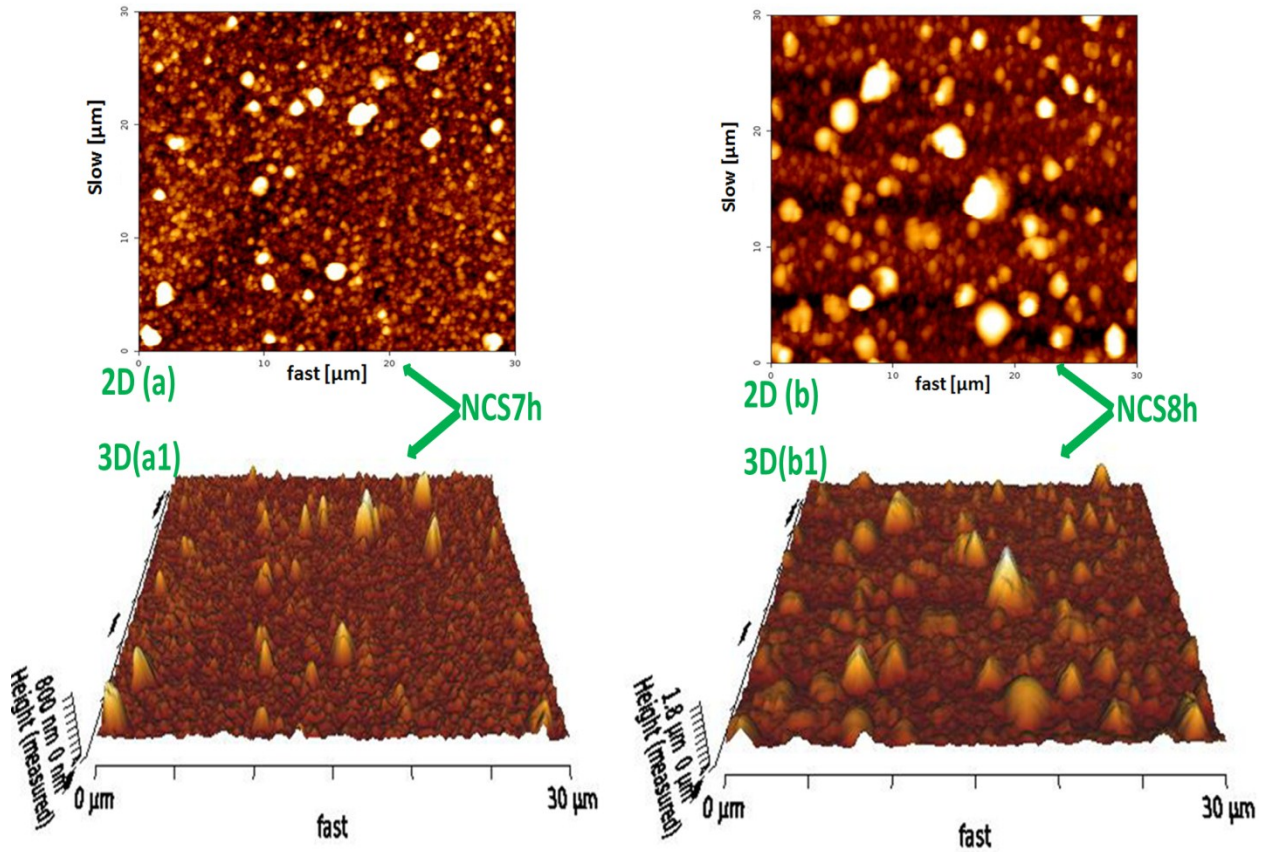

Fig S2. 2D (a, and b) and 3D (a1, and b1) AFM images of NCS7h, and NCS8h CEs.

**NiCo<sub>2</sub>S<sub>4</sub> photo-voltaic performance compared to the recent results of quantum dot sensitized solar cells:**

Fig S3 shows the NiCo<sub>2</sub>S<sub>4</sub> photo-voltaic performance compared to the recent results of quantum dot sensitized solar cells (NiCoS, CuS/rGo, CuS/PbS, mOs/Graphene, MoO/C, CuS/Graphene, NiS, CuS, CoSe, CuInSe, PbS, CoS/C), respectively. The results are shown in table 1.

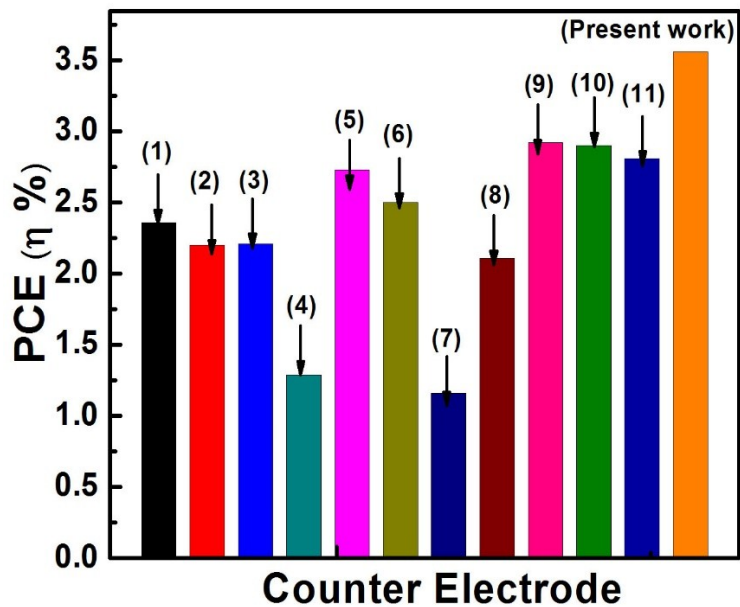

**Fig. S3.** NiCo<sub>2</sub>S<sub>4</sub> photo-voltaic performance compared to the recent results of quantum dot sensitized solar cells: PCE values for cells (NiCoS, CuS/rGo, CuS/PbS, mOs/Graphene, MoO/C, CuS/Graphene, NiS, CuS, CoSe, CuInSe, PbS, CoS/C) were taken from ref. 1–12.

| Serial Number | Counter Electrode | Efficiency | Year |
|---------------|-------------------|------------|------|
| 1             | NiCoS             | 3.14       | 2018 |
| 2             | CuS/RgO           | 2.36       | 2018 |
| 3             | CuS/PbS           | 2.2        | 2015 |
| 4             | MoS/Graphene      | 2.21       | 2017 |
| 5             | MoO/C             | 1.29       | 2017 |
| 6             | CuS/Graphene      | 2.73       | 2016 |

|    |           |      |      |
|----|-----------|------|------|
| 7  | NiS       | 2.5  | 2017 |
| 8  | CuS       | 1.16 | 2017 |
| 9  | CoSe      | 2.11 | 2015 |
| 10 | CuInSe    | 2.92 | 2018 |
| 11 | PbS       | 2.90 | 2017 |
| 12 | CoS/C     | 2.81 | 2017 |
| 13 | This Work | 3.53 |      |

## References

- (1) J. Deng, M. Wang, X. Song, Z. Yang and Z. Yuan, *Nanomaterials.*, 2018, **8**, 251.
- (2) A. Hessein, and A. A. El-Moneim, *New Carbon Materials.*, 2018, **33(1)**: 26-35.
- (3) M. Eskandari, V. Ahmadi b, and R. Ghahary, *Electrochim. Acta.*, 2015, **151**, 393–398.
- (4) M. Zhena, F. Lia,\* R. Liua, C. Songa, L. Xua, and X. Z. Luob, *J. Photochem. Photobiol.*, 2017, 340, 120–127.
- (5) P.S Tambolia, M.B. Rajendra Prasad, V. S. Kadam, and S. Rajiv Vhatkar, Inamuddind, M. Habib Pathan, and S. S. Mahajana, *Sol. Energy mater Sol. Cells.*, 2017, **161**, 96–101.
- (6) S. S. Khalili and H. Dehghani, *RSC Adv.*, 2016, **6**, 10880–10886.
- (7) Q. Han, H. Zheng, and M. Wu, *Eur. J. Inorg. Chem.*, **2017**, 3787–3793.

- (8) S. V. Bhat, M. Dhanasekar, K. M. Rickey, and X. Ruan, *ChemistrySelect.*, 2017, **2**, 10736 – 10740.
- (9) C. Ma, Q. Tang, Z. Zhao, M. Hou, Y. Chen, B. He, and L. Yu, *J. Power Sources.*, 2015, **278**, 183-189.
- (10) H. Guoa, R. Zhou, Y. Huang, L. Wan, W. Gan, H. Niub, and J. Xub, *J.ceramint.*, 2018, 05, 228.
- (11) M.A. Mingsukanga, M.H. Buraidaha, M.A. Careema, I. Albinssonb, B.E. Mellander, and A.K. Arof, *Electrochim. Acta.*, 2017, **241**, 487–496.
- (12) S. S Khalili, H. Dehghani, and M. Afrooz, *J. Colloid Interface Sci.*, 2017, **493**, 32-41
